# Supplementary material for: In Ovo Delivered Toll-Like Receptor 7 Ligand, Resiquimod Enhances Host Responses against Infectious Bronchitis Corona Virus (IBV) Infection
Source: PubMed Central journal article supplement (PMC7349678; doi:10.3390/vaccines8020186), 2020-04-15
Supplement: vaccines-08-00186-s001.pdf [file vaccines-08-00186-s001.pdf]

Article

# In Ovo Delivered Toll-Like Receptor 7 Ligand, Resiquimod Enhances Host Responses against Infectious Bronchitis Corona Virus (IBV) Infection

Upasama De Silva Senapathi <sup>1</sup>, Mohamed Aboelkhair <sup>2</sup>, Kekungu Puro <sup>3</sup>, Mariam Ali <sup>1</sup>, Aruna Amarasinghe <sup>1</sup>, M. Sarjoon Abdul-Cader <sup>1</sup>, Guido Van Marle <sup>4</sup>, Markus Czub <sup>1</sup> and Mohamed Faizal Abdul-Careem <sup>1,\*</sup>

Table S1. PCR primers used in RT-PCR assays.

| Primer         | Sequence (5'-3')           | Fragment (bps) | Reference |
|----------------|----------------------------|----------------|-----------|
| IBV-N          | F-GACGGAGGACCTGATGGTAA     | 206            | [19]      |
|                | R-CCCTTCTTCTGCTGATCCTG     |                |           |
| $\beta$ -actin | F-CAACACAGTGCTGTCTGGTGGTA  | 205            | [19]      |
|                | R-ATCGTACTCCTGCTTGCTGATCC  |                |           |
| IL-1 $\beta$   | F-GTGAGGCTCAACATTGCGCTGTA  | 214            | [19]      |
|                | R-TGTCCAGGCGGTAGAAGATGAAG  |                |           |
| iNOS           | F-GGCAGCAGCGTCTCTATGACTTG  | 185            | [19]      |
|                | R-GACTTTAGGCTGCCAGGTTG     |                |           |
| IFN- $\gamma$  | F-ACACTGACAAGTCAAAGCCGCACA | 129            | [19]      |
|                | R-AGTCGTTTCATCGGGACCTTGGC  |                |           |

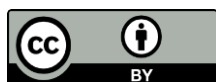

© 2020 by the authors. Submitted for possible open access publication under the terms and conditions of the Creative Commons Attribution (CC BY) license (<http://creativecommons.org/licenses/by/4.0/>).
